# Supplementary material for: Growth Hormone Receptor Gene is Essential for Chicken Mitochondrial Function In Vivo and In Vitro
Source: PubMed Central journal article supplement (PMC6480491; doi:10.3390/ijms20071608), 2019-03-31
Supplement: ijms-20-01608-s001.pdf [file ijms-20-01608-s001.pdf]

## Supplemental Information

**Table S1.** Primers used in qRT-PCR.

| Gene   | Primer sequence (5' to 3') | Size | Annealing temp. (°C) |
|--------|----------------------------|------|----------------------|
| F-ND1  | ACCCAAGAGCCCATCTACCT       | 154  | 56                   |
| R-ND1  | GTCCGGCGGCATATTCTACA       |      |                      |
| F-ND2  | CCGAGCGATTGAAGCCACTA       | 103  | 56                   |
| R-ND2  | TCATTGTCCGGTGGATCAGG       |      |                      |
| F-ND3  | CACCACTATCATCGCCCTCC       | 72   | 56                   |
| R-ND3  | TCTGCTCATTCTAAGCCGCC       |      |                      |
| F-ND4  | AGCGCAGGCATTTACCTTCT       | 144  | 56                   |
| R-ND4  | TG TTCAGGAGGCAGGTAGGT      |      |                      |
| F-ND4L | ATGTCTCCCCTACACTTCAGC      | 82   | 56                   |
| R-ND4L | AGATGAGGTGTGTTCCGGTGG      |      |                      |
| F-ND5  | CTAATCCTAGCCGCCACAGG       | 79   | 56                   |
| R-ND5  | GGGTTGGGCCTTCTATTGCT       |      |                      |
| F-ND6  | ACCCAAACTCACTAACCACCC      | 88   | 56                   |
| R-ND6  | TGTGGCGTCTAATCCTTCGC       |      |                      |
| F-CYTB | CAGCAGACACATCCCTAGCC       | 104  | 56                   |
| R-CYTB | GAAGAATGAGGCGCCGTTTG       |      |                      |
| F-COX1 | ACTACTTACCGACCGCAACC       | 132  | 56                   |
| R-COX1 | CCGAAACCTGGGAGGATGAG       |      |                      |
| F-COX2 | TCGGGGTAAAAACAGACGCA       | 70   | 56                   |
| R-COX2 | ACTCCTGGTCGAGTGGTGAT       |      |                      |
| F-COX3 | CCCAAGCCCATGACCAATCT       | 168  | 56                   |
| R-COX3 | TGGAAGGTGCTTTCTCGGAC       |      |                      |
| F-ATP6 | TACAGCCACAATCGCCCTAC       | 123  | 56                   |
| R-ATP6 | AGGACGAAGACGTAGGCTTG       |      |                      |
| F-ATP8 | AACCCAAACCCATGATTCTCCA     | 139  | 56                   |

---

|                  |                          |     |    |
|------------------|--------------------------|-----|----|
| R-ATP8           | AGG TTCAGGGGGTGGGTTTA    |     |    |
| F-PGC1 $\alpha$  | TCCTTTCCTCAACGCAGGTC     | 153 | 56 |
| R-PGC1 $\alpha$  | TCTTGCACGTGAGGGAGAAC     |     |    |
| F-NRF1           | ACGAGGACTCACCTTCCTCA     | 163 | 56 |
| R-NRF1           | TGTGGTCGCTTCCGTTTCTT     |     |    |
| F-TFAM           | GACCTCGAAGTGGCTTCAAC     | 144 | 56 |
| R-TFAM           | GAGCAAGCTGAAGGTATGGCT    |     |    |
| F-GH             | TGCAATACCTAAGCAAGGTGTTCA | 101 | 62 |
| R-GH             | CAGGGCTTGGATCCCTTCTT     |     |    |
| F-GHR            | GCAAGTGCAGGTCACCTGAG     | 153 | 56 |
| R-GHR            | CCGGACATTCTTTCCAGTCT     |     |    |
| F-IGF1           | TTGGCCTGTGTTTGCTTACC     | 265 | 56 |
| R-IGF1           | ATTCCCTTGTGGTGTAAGCGT    |     |    |
| F- $\beta$ actin | GATATTGCTGCGCTCGTTG      | 178 | 56 |
| R- $\beta$ actin | TTCAGGGTCAGGATACCTCTTT   |     |    |

---
